# Supplementary material for: Potassium-rich antiperovskites K3HTe and K3FTe and their structural relation to lithium and sodium counterparts
Source: Royal Society of Chemistry journal article supplement (doi:10.1039/d3dt01039b), 2023-01-01
Supplement: d3dt01039b1.pdf [file d3dt01039b1.pdf]

## Supplementary Information

### **Potassium-rich antiperovskites $K_3\text{HTe}$ and $K_3\text{FTe}$ and their structural relation to lithium- and sodium-rich counterparts**

Koji Okada,<sup>a</sup> Susumu Fujii,<sup>b,c</sup> Cédric Tassel,<sup>a</sup> Shenghan Gao,<sup>a</sup> Hiroki Ubukata,<sup>a</sup> Wenli Pan,<sup>d</sup> Kentaro Yamamoto,<sup>d,e</sup> Yoshihisa Uchimoto,<sup>d</sup> Akihide Kuwabara,<sup>b\*</sup> Hiroshi Kageyama<sup>a\*</sup>

<sup>a</sup> *Department of Energy and Hydrocarbon Chemistry, Graduate School of Engineering, Kyoto University, Nishikyo-ku, Kyoto 615-8510, Japan.*

<sup>b</sup> *Nanostructures Research Laboratory, Japan Fine Ceramics Center, Nagoya 456-8587, Japan.*

<sup>c</sup> *Division of Materials and Manufacturing Science, Graduate School of Engineering, Osaka University, Osaka 565-0871, Japan.*

<sup>d</sup> *Graduate School of Human and Environment Studies, Kyoto University, Sakyo-ku, Kyoto 606-8501, Japan*

<sup>e</sup> *Faculty of Engineering, Nara Women's University, Kitauoyanishimachi, Nara 630-8506, Japan.*

\*Corresponding author: [kuwabara@jfcc.or.jp](mailto:kuwabara@jfcc.or.jp) and [kage@scl.kyoto-u.ac.jp](mailto:kage@scl.kyoto-u.ac.jp)

Table of Contents:

|                                                                                   |                            |
|-----------------------------------------------------------------------------------|----------------------------|
| Section 1. XRD patterns of $K_3HTe$ and $K_3FTe$ -----                            | 3-                         |
| 4                                                                                 |                            |
|                                                                                   | Supplementary Figures 1, 2 |
| Section 2. Size-flexibility of soft anions -----                                  | 5                          |
|                                                                                   | Supplementary Figure 3     |
| Section 3. The migration barriers in $K_3HTe$ and $K_3FTe$ -----                  |                            |
| 6                                                                                 |                            |
|                                                                                   | Supplementary Figure 4     |
| Section 4. The ionic conduction in pristine and iodine substituted $K_3HTe$ ----- | 7                          |
|                                                                                   | Supplementary Figure 5     |
| Section 5. Supplementary references -----                                         | 8                          |

Section 1. XRD patterns of  $K_3HTe$  and  $K_3FTe$

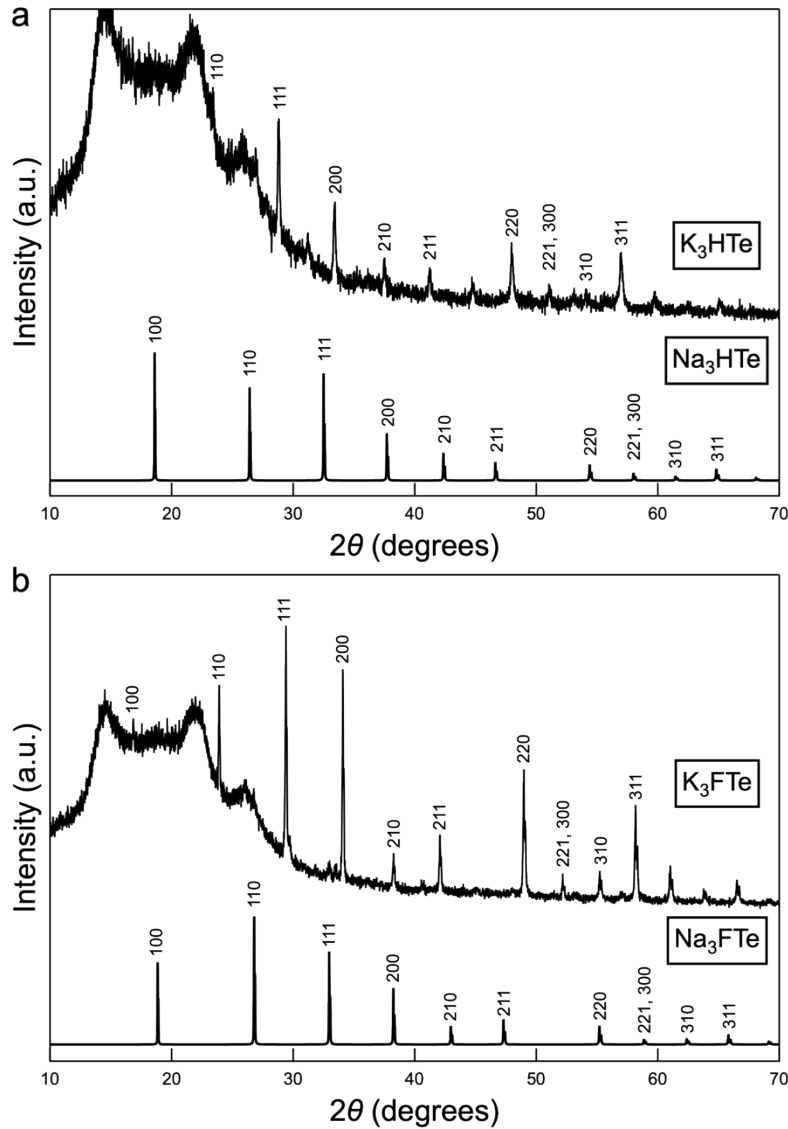

**Figure S1** XRD patterns of (a)  $K_3HTe$  synthesized under high pressure using a mixture of KH and  $K_2Te$  in a molecular ratio of 2:1 and reported cubic  $Na_3HTe$ ,<sup>1</sup> and (b)  $K_3FTe$  synthesized under high pressure using a mixture of KF and  $K_2Te$  in a molecular ratio of 1:1 and reported cubic  $Na_3FTe$ .<sup>2</sup> The diffraction peaks are indexed in a cubic symmetry and labelled with the Miller indices of the lattice planes.

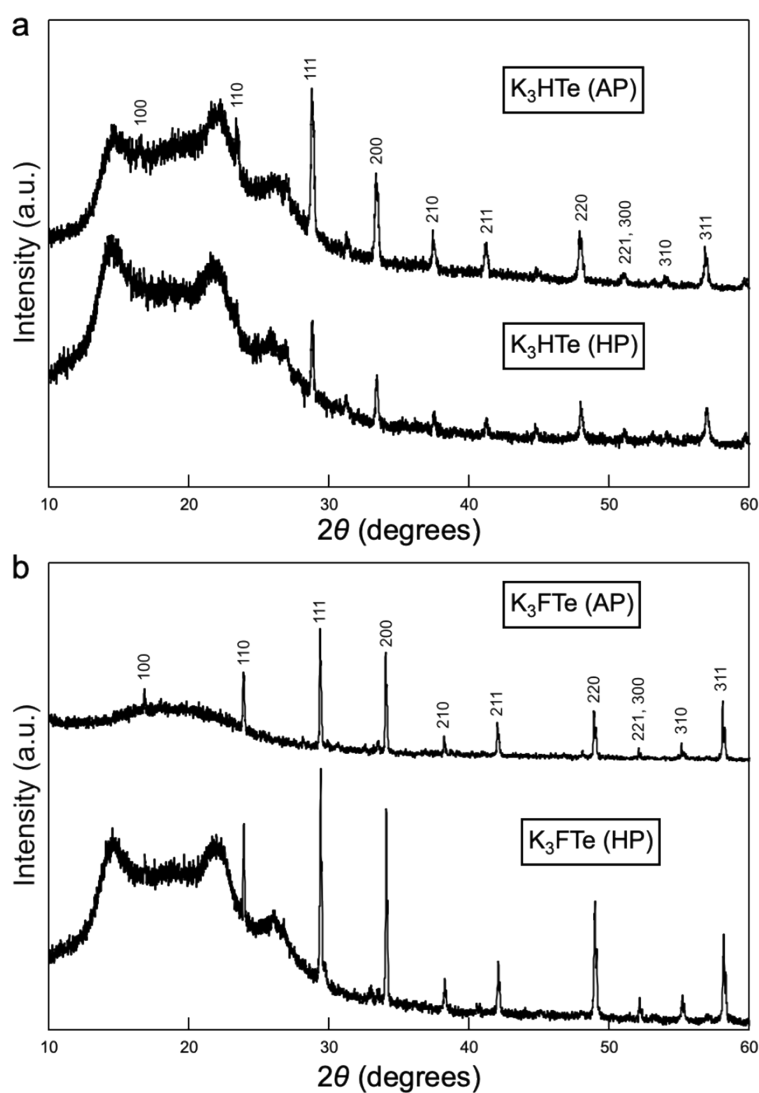

**Figure S2** XRD patterns of (a)  $K_3FTe$  synthesized under ambient pressure (top) and under high pressure (bottom), and (b)  $K_3FTe$  synthesized under ambient pressure (top) and under high pressure (bottom). The diffraction peaks are indexed in a cubic symmetry and labelled with the Miller indices of the lattice planes. Almost the same diffraction patterns (i.e., almost the same lattice constants) are obtained for both conditions in both compounds.

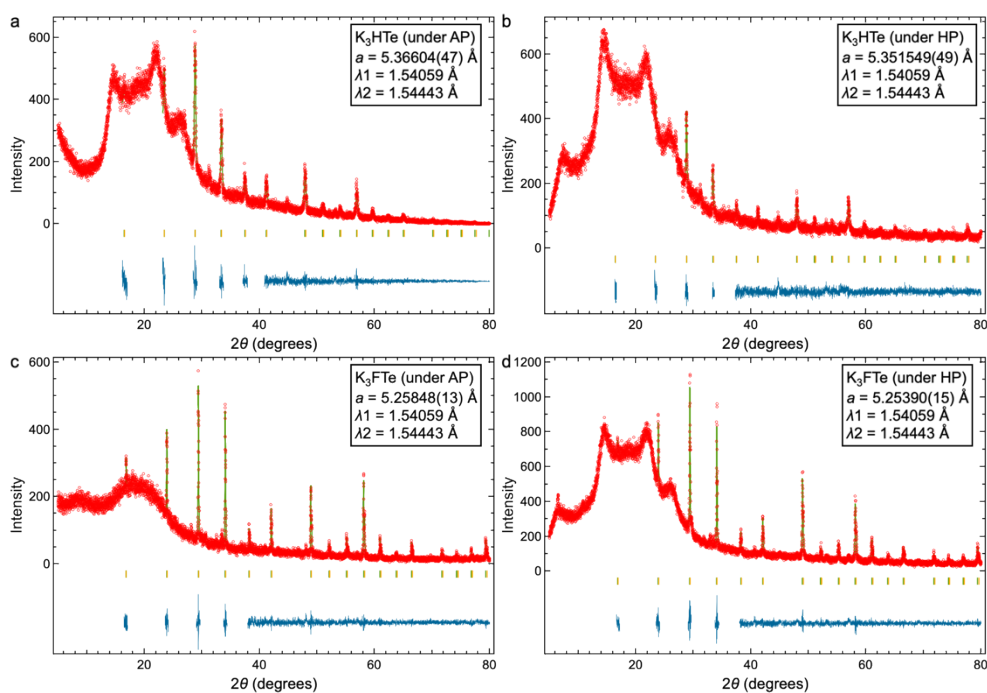

**Figure. S3** Le Bail refinement for  $K_3HTe$  (a) synthesized under ambient pressure and (b) synthesized under high pressure and for  $K_3FTe$  (c) synthesized under ambient pressure and (d) synthesized under high pressure, respectively. The red circles, green solid lines, and blue solid lines represent the observed, calculated, and difference intensities, respectively. The green and yellow ticks indicate the calculated Bragg reflections from  $K_{\alpha_1}$  and  $K_{\alpha_2}$  Cu x-ray, respectively. The peak of Kapton tape in the low angle is removed from the refinement.

## Section 2. Size-flexibility of soft anions

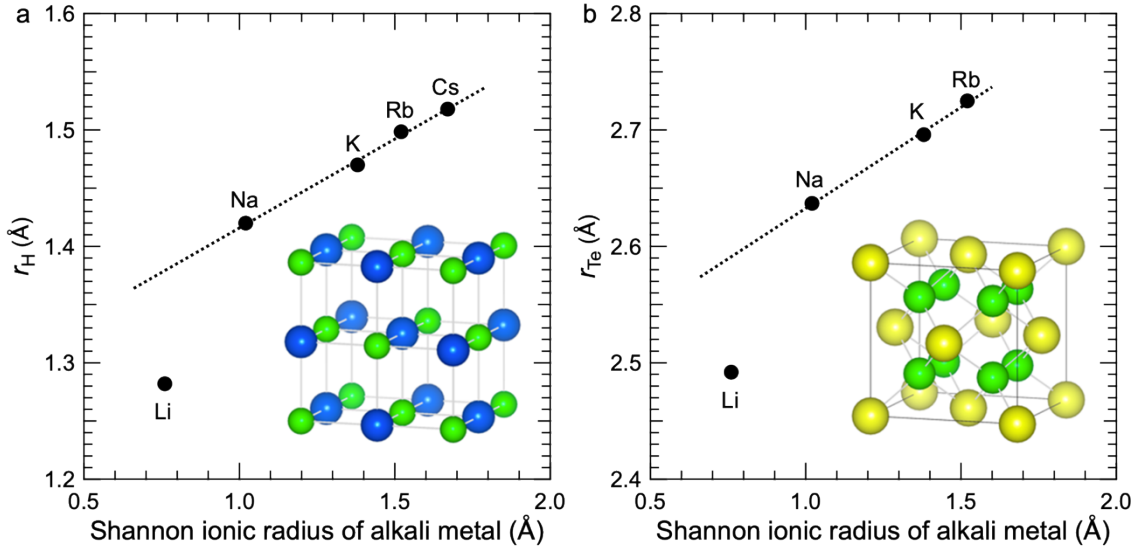

**Figure S4** Size flexibility of (a) H in rock-salt type  $MH$  ( $M = \text{Li, Na, K, Rb, Cs}$ )<sup>3,4</sup> and (b) Te in anti-fluorite type  $M_2\text{Te}$  ( $M = \text{Li, Na, K, Rb}$ )<sup>5,6</sup> depending on the Shannon ionic radius<sup>7</sup> of alkali metal cation species (alkali metal: green, H: blue, Te: yellow). Unexpected contracts in the soft anions, H and Te, is seen in Li systems in each series. This is attributed to the surface charge density of the alkali metal as seen in antiperovskites  $M_3\text{HTe}$  and  $M_3\text{FTe}$  ( $M = \text{Li, Na, K}$ ).

### Section 3. The migration barriers in $K_3HTe$ and $K_3FTe$

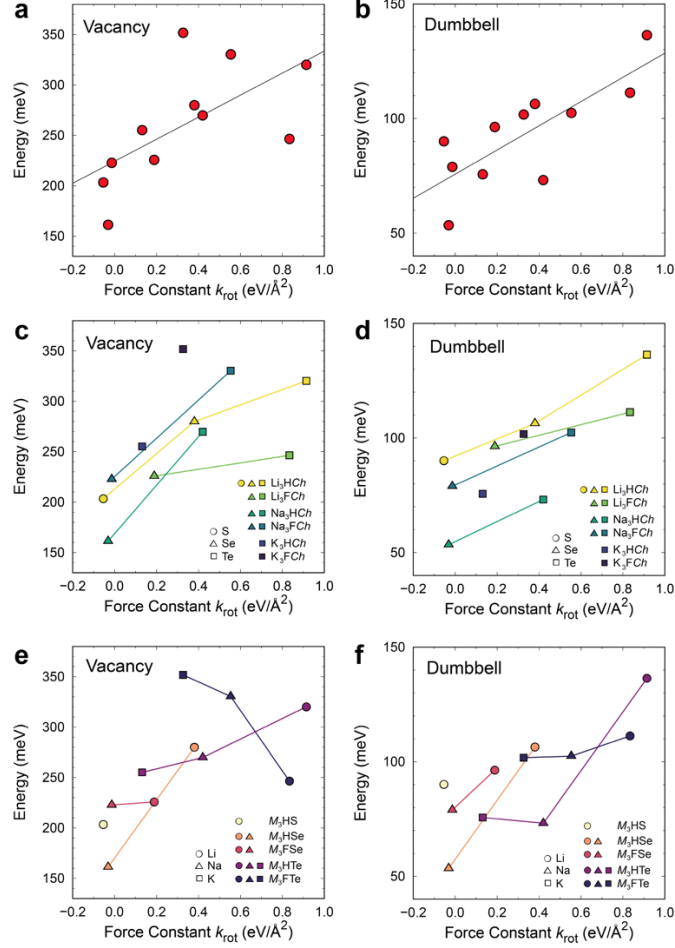

**Figure S5** (a,b) Migration energy barriers of  $M_3BCh$  ( $M = Li, Na, K$ ;  $B = H, F$ ;  $Ch = S, Se, Te$ ) for (a) vacancy and (b) interstitial dumbbell mechanisms as a function of force constant  $k_{rot}$ . The migration energy barriers of Li- and Na-rich antiperovskites are taken from our previous papers.<sup>1,2</sup>  $k_{rot}$  is related to the rotational phonon mode of  $BM_6$  and was

estimated by the equation of simple harmonic motion  $\omega_{rot} = \sqrt{k_{rot}/m_M}$ , where  $\omega_{rot}$  is the phonon frequency of the rotational mode at the M point and  $m_M$  is the atomic mass of  $M$ . Small  $k_{rot}$  indicates that the octahedron is more easily rotated (see our previous papers<sup>1,2</sup> for more details). The black line is a least-squares approximation of the points. The activation energy decreases with decreasing  $k_{rot}$  for both mechanisms, suggesting that  $k_{rot}$  is an important factor in determining the activation energy in  $M_3BCh$ . (c,d) Same as (a,b) but compounds are categorized into six groups:  $Li_3HCh$ ,  $Li_3FCh$ ,  $Na_3HCh$ ,  $Na_3FCh$ ,  $K_3HCh$  and  $K_3FCh$ . (e,f) Same as (a,b) but compounds are categorized into five groups:

$M_3\text{HS}$ ,  $M_3\text{HSe}$ ,  $M_3\text{FSe}$ ,  $M_3\text{HTe}$ , and  $M_3\text{FTe}$ . In (c) and (d), the activation energy decreases with increasing  $k_{\text{rot}}$  for each group, but the gradient and magnitude of energy are different. In (e) and (f), the activation energy decreases as  $k_{\text{rot}}$  decreases in most groups, though increases in  $M_3\text{FTe}$  with the vacancy mechanism. These results indicate that there are other factors influencing the activation energy than  $k_{\text{rot}}$ , such as the structural distortion in the vicinity of migrating  $M^+$  ion.



Section 4. The ionic conduction of pristine and iodine substituted  $K_3HTe$

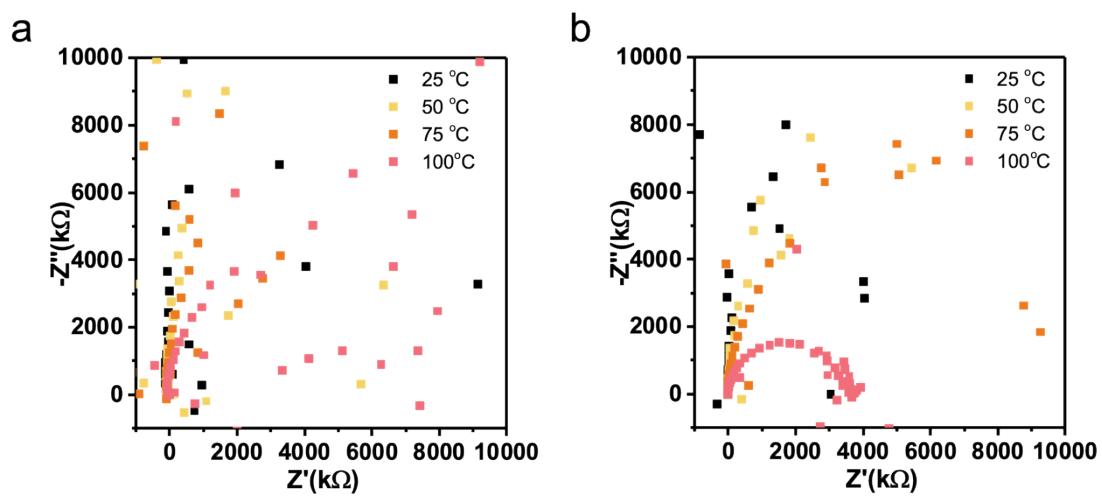

**Figure S6** Cole-Cole plots for (a) pristine  $K_3HTe$  and (b) iodine doped  $K_3HTe$ .

## Section 5. Supplementary references

- 1 S. Gao, T. Broux, S. Fujii, C. Tassel, K. Yamamoto, Y. Xiao, I. Oikawa, H. Takamura, H. Ubukata, Y. Watanabe, K. Fujii, M. Yashima, A. Kuwabara, Y. Uchimoto and H. Kageyama, *Nat. Commun.*, 2021, **12**, 201.
- 2 S. Fujii, S. Gao, C. Tassel, T. Zhu, T. Broux, K. Okada, Y. Miyahara, A. Kuwabara and H. Kageyama, *J. Am. Chem. Soc.*, 2021, **143**, 10668–10675.
- 3 E. Zintl and A. Harder, *Z. Phys. Chem.*, 1931, **B14**, 265–284.
- 4 L. Elansari, L. Antoine, R. Janot, J. C. Gachon, J. J. Kuntz and D. Guérard, *J. Alloys Compd.*, 2001, **329**, 5–8.
- 5 E. Zintl, A. Harder and B. Dauth, *Ztschr. Elektrochem.*, 1934, **40**, 588–593.
- 6 H. Sommer and R. Hoppe, 1977, **429**, 118–130.
- 7 R. D. Shannon, *Acta Crystallogr. Sect. A*, 1976, **32**, 751–767.
